## Closed-loop sacral neuromodulation for bladder function using dorsal root ganglia sensory feedback in an acute feline model

Zhonghua Ouyang<sup>1,2</sup>, Nikolas Barrera<sup>1,2</sup>, Zachariah J. Sperry<sup>1,2</sup>, Elizabeth C. Bottorff<sup>1,2</sup>, Katie C. Bittner<sup>3</sup>, Lance Zirpel<sup>3</sup>, Tim M. Bruns<sup>1,2</sup>

<sup>1</sup> Biomedical Engineering Department, University of Michigan, Ann Arbor, MI, USA

<sup>2</sup> Biointerfaces Institute, University of Michigan, Ann Arbor, MI, USA

<sup>3</sup> Pelvic Health & Gastric Therapies, Medtronic Restorative Therapies Group, Minneapolis, MN, USA

### Corresponding Author

Tim M. Bruns, PhD

[bruns@umich.edu](mailto:bruns@umich.edu)

(734) 647-8727

B10-A169 NCRC

2800 Plymouth

Ann Arbor, MI 48109-2800

### Abstract

Overactive bladder patients suffer from a frequent and uncontrollable urge to urinate, which can lead to a poor quality of life. Current sacral neuromodulation therapy uses open-loop electrical stimulation to alleviate symptoms, which limits battery life and can lead to neural habituation. In this study, we aim to improve therapy by developing a conditional stimulation paradigm using neural recordings from dorsal root ganglia (DRG) as sensory feedback. Experiments were performed in 5 non-survival, anesthetized felines, in which the sacral-level DRG and spinal roots were exposed bilaterally. A bipolar cuff electrode was placed on a S1 root distal to the DRG for stimulation. Microelectrode arrays were implanted in the same or opposite S1 and/or S2 DRG. We implemented a Kalman filter-based algorithm to estimate the bladder pressure in real-time using DRG neural recordings. The Medtronic Summit Research Development Kit was used to control sacral root stimulation when the algorithm detected an increase in bladder pressure. Closed-loop neuromodulation was performed during continuous cystometry and compared to bladder fills with continuous and no stimulation. Closed-loop stimulation with DRG sensory feedback reduced stimulation time by 57.7% compared to continuous, standard stimulation. Bladder capacity was increased by 13.8% over no stimulation and by 4.3% over continuous stimulation trials ( $p < 0.001$  and  $= 0.53$ , respectively). Stimulation reduced the sensitivity of high-confidence bladder single units, with 35.5% lower linear trendline fits and 466.9% higher pressure thresholds for firing observed during stimulation trials. This study demonstrates the utility of decoding bladder pressure from neural activity for closed-loop control of sacral neuromodulation. An underlying mechanism for sacral neuromodulation may be a reduction in bladder sensory neuron activity during stimulation. Real-time validation during behavioral studies is necessary prior to clinical translation of closed-loop sacral neuromodulation.

**Keywords:** cat, dorsal root ganglia, electrical stimulation, bladder, closed-loop

## 1. Introduction

Overactive bladder (OAB) is a dysfunction that affects millions of people worldwide. Patients suffer from frequent urinary urgency, with or without incontinence [1], leading to a variety of side effects such as poor sleep, declined mental health, and a low quality of life [2]. Conservative therapies such as anticholinergic drugs and intravesicular Botox injections are both associated with undesirable side effects, leading to low patient compliance [3], and anticholinergics are also associated with an increased risk of dementia [4]. Currently there is no pharmaceutical therapy that permanently reduces or eliminates the symptoms without serious side effects [4], [5].

Sacral neuromodulation (SNM) is a standard clinical treatment for OAB after conservative approaches such as behavioral modification and pharmaceuticals fail [6]. SNM has improved symptoms of overactive bladder for over 300,000 patients. One study reported that 82% of patients discontinued OAB medication after SNM treatment for at least 22 months [7]. In SNM, a stimulation lead is placed near the S3 or S4 sacral nerve in a minimally invasive surgery. SNM is applied constantly at 14 Hz to reduce the symptoms of OAB [8]. Despite its high success rate and minimum side effects [6], [9], it has been reported that patients can experience relapse of symptoms after 24 months [10] or longer [6]. Continuous stimulation can facilitate habituation of neural pathways over time [11]. Pre-clinical and clinical pilot studies have demonstrated that sensory feedback-based, or closed-loop, stimulation of relevant nerves may offer greater clinical benefit by driving bladder function only when necessary, leading to increased bladder capacity [12], [13]. However, these methods either require patient activation multiple times a day or need a separate procedure for implanting a direct pressure monitoring device.

Bladder sensory signals can be observed at sacral dorsal root ganglia (DRG) [14]. In addition to physical proximity to the sacral neuromodulation site, sacral-level DRG contain afferent-only signals from the detrusor muscle and urethra, via proximal pelvic and pudendal nerve fibers [15], [16]. In this study, we used sacral-level DRG as a recording site to estimate bladder pressure and the onset of bladder contractions in real-time [17] to automatically trigger closed-loop neuromodulation in acute, healthy cats. This is the first study to examine closed-loop SNM on bladder capacity using neural signals as feedback. While from a pre-clinical research perspective, bladder capacity is usually considered as the most important performance metric, in this study we also evaluate non-voiding bladder contraction behavior. Sensory neurons activated during bladder pressure increases and voiding contractions are also usually activated during non-voiding contractions [17]. These non-voiding contractions may contribute sensations of urgency in OAB, and are therefore undesirable. We hypothesize that closed-loop stimulation increases bladder capacity, reduces the frequency of non-voiding contractions (NVCs), and extends the intervals between non-voiding contractions to the same extent as continuous stimulation while applying significantly less stimulation than continuous stimulation.

## 2. Methods

### 2.1 Animals

All procedures were approved by the University of Michigan Institutional Animal Care and Use Committee (IACUC), in accordance with the National Institute of Health's guidelines for the care and use of laboratory animals. Five adult, domestic, short-hair male cats ( $0.99 \pm 0.27$  years old,  $4.70 \pm 0.57$  kg, Marshall BioResources, North Rose, NY) were used in this study (designated as experiments 1–5). Cats were used due to their high relevance to human physiology and their long history of study in bladder neurophysiology [18]. Prior to use, animals were free-range housed with up to 3 other cats in a 413 ft<sup>2</sup> room with controlled temperature (19–21 °C) and relative humidity (35–60%), food and water

available ad lib, and a 12-hour light/dark cycle. Animals received enrichment via staff interaction and toys.

## 2.2 Surgical procedure

As in prior studies [17], [19], animals were anesthetized with a mixture of ketamine (6.6 mg/kg), butorphanol (0.66 mg/kg), and dexmedetomidine (0.011 mg/kg) administered intramuscularly. Animals were intubated and subsequently maintained on isoflurane anesthesia (0.5-4%) during surgical procedures. Respiratory rate, heart rate, end-tidal CO<sub>2</sub>, O<sub>2</sub> perfusion, temperature, and intra-arterial blood pressure were monitored continuously using a SurgiVet vitals monitor (Smiths Medical, Dublin, OH). Fluids (1:1 ratio of lactated Ringers solution and 5% dextrose) were infused intravenously via the cephalic vein at a rate of 10 mL/hr during surgery as needed. A 3.5 Fr dual-lumen catheter was inserted to the bladder through the urethra for fluid infusion and pressure monitoring. The urethra was not ligated. A midline dorsal incision was made to expose the L7 to S3 vertebrae and a partial laminectomy was performed to access sacral DRG. A lab-fabricated bipolar stimulation cuff (1.5 or 2 mm inner diameter) was placed on the left or right S1 root encompassing both the sensory and motor branches.

Two iridium oxide microelectrode arrays for neural recordings (4x8 configuration; 1.0 mm shank length; 0.4 mm shank pitch; Blackrock Microsystems, Salt Lake City, UT) were implanted into (1) left and right S1 DRG or (2) S1 and S2 DRG on the same side using a pneumatic inserter (Blackrock Microsystems). Array reference wires were placed near the spinal cord and ground wires were attached to a stainless steel needle inserted below the skin (lateral and caudal to the laminectomy incision site). At the conclusion of surgical procedures, prior to experimental testing, animals were transitioned to

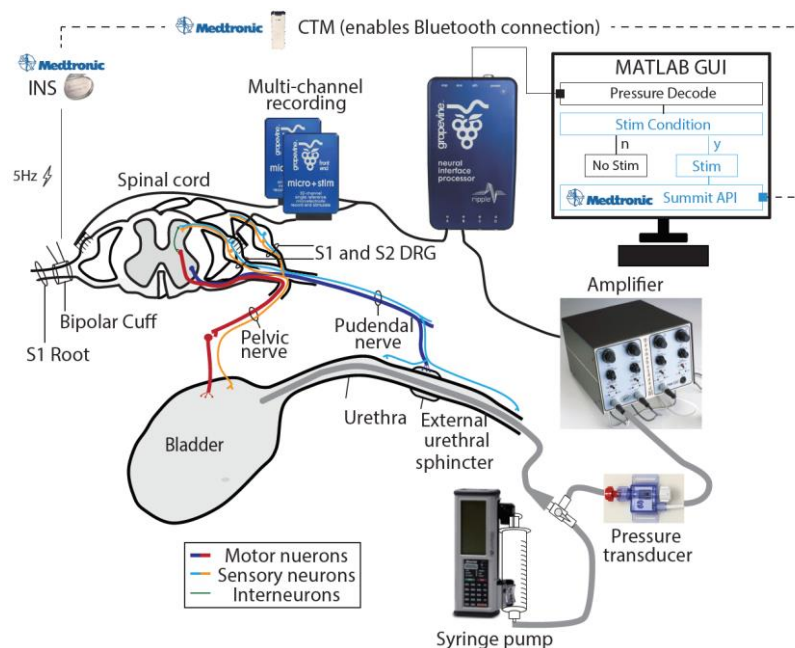

**Figure 1.** Illustration of the testing setup. DRG neural recordings were acquired with a Ripple Grapevine system and accompanying Ripple Trellis software via microelectrode arrays implanted in S1 and S2 DRG. Trials consisted of recording neural data and bladder pressure (monitored with a pressure transducer and amplifier) during saline infusions at a controlled rate via an intraurethral bladder catheter. Pressure data was recorded with the Grapevine system after amplification. Real-time decoding was performed in a MATLAB GUI that contains the Summit Application Programming Interface (API) that enables Bluetooth control of the Implantable Neural Stimulator (INS) through a Clinician Telemetry Module (CTM).

intravenous alpha-chloralose (C0128, Sigma Aldrich; 70 mg/kg induction; 20 mg/kg maintenance). This transition was at least six hours after induction, and we expect that there were no residual effects on bladder function due to the induction dosing of ketamine, butorphanol, or dexmedetomidine. Analgesia was augmented with 0.01 mg/kg buprenorphine every 8–12 hours subcutaneously.

### *2.3 Closed-loop SNM system*

Prior to the main cystometry experiments, stimulation parameter optimization was performed. In isovolumetric trials, 5 Hz (200  $\mu$ s pulse width) stimulation on the S1 root was more effective at inhibiting bladder non-voiding and voiding contractions at 2 times the motor threshold (MT) for scrotum, anus or tail twitching, compared to 2, 7, 10, 15, and 33 Hz. This stimulation parameter combination (5 Hz, 2xMT) was selected for all experiments in this study, unless significant movement artifacts were observed and then stimulation was reduced to 1-1.5xMT.

To deliver closed-loop stimulation, sacral nerve stimulation and microelectrode array recordings were integrated through the Medtronic Summit Research Development Kit (RDK), which is comprised of an Olympus RC+S (B35300R) Implantable Neural Stimulator (INS) connected to a four-electrode stimulation lead (Medtronic Model 3889), the Summit Application Programming Interface (API), and other supporting hardware components including a Research Lab Programmer (RLP, a tablet mainly for setting stimulation parameters and safety limits), Clinician Telemetry Modules (CTMs) that enable wireless connection between the INS and the research host computer (for delivering closed-loop stimulation) or the RLP, a Patient Therapy Manager (PTM, for charging the INS and parameter setting), and a Recharge Therapy Manager (RTM) that enables inductive charging of the INS through the PTM. The bipolar cuff stimulation wires were anchored on two of the four electrodes on the lead with modelling clay. A setup diagram is shown in Figure 1. The Summit RDK software package allows programmatic control of the INS through a MATLAB interface, in which a previously developed Kalman filter algorithm [17], [19] was implemented to decode bladder pressure (as a control signal) from the neural recordings (collected at 30 kHz per channel through the Ripple Grapevine system and Trellis software). The neural recordings were processed with a dual threshold at  $\pm 3.5$ - $5.5 \times$  RMS of the signal to obtain threshold crossings. The algorithm extracted unsorted threshold crossing firing rates at 1-second intervals from recording channels and combined them with a state-dependent model to estimate the bladder pressure using a weighted average method. DRG microelectrode channels with a firing rate to bladder pressure correlation of greater than 0.7 were included in the model. If no more than one channel had a correlation greater than 0.7, then this cutoff was reduced in 0.1 increments until there was at least two channels used by the model. A cross-channel invalidation method was applied before the firing rates were calculated to remove threshold crossings that simultaneously appeared on over 90% of the channels, to minimize the effect of stimulation artifacts.

### *2.4 Experimental trials*

Cystometry trials were performed in which the bladder was infused with 0.9% saline (warmed to 41 °C) through a 3.5 Fr urethra catheter at 2 ml/min from an empty volume to when the first leak around the urethra catheter was observed. In each trial, one of three stimulation paradigms was used: continuous (“standard SNM”), closed-loop stimulation (intermittent SNM), or no stimulation (except in experiment 5, in which only no-stimulation and closed-loop stimulation were performed). In closed-loop trials, stimulation was initiated based on a bladder contraction detection algorithm, indicating when the DRG decoding algorithm showed an increase in bladder pressure within a certain time window. The first two experiments were exploratory, in which the contraction detection algorithm was varied and closed-loop sacral nerve stimulation was conditionally turned on for 15-60 s when an estimated bladder pressure increase of 3-10 cmH<sub>2</sub>O was observed in a 3-6 s window. Observations from cystometry trials and additional isovolumetric trials in these two experiments and a third, separate experiment without

cystometry trials were used to select the final contraction detection algorithm. In the last three experiments, the contraction detection algorithm was fixed, and closed-loop stimulation was turned on for 15 seconds after a 6 cmH<sub>2</sub>O increase in estimated pressure was observed in a 4-second moving interval. A stimulation amplitude of 2xMT was used in all trials unless an excessive amount of animal movement was observed, in which case the amplitude was reduced to 1-1.5xMT. The order of the trials was not completely random, as we prioritized running as many closed-loop and no-stimulation trials as possible within a limited experimental time.

After each trial ended, the bladder capacity was measured as the amount of fluid in the bladder when the first leak was observed. This was done by adding the fluid volume manually emptied from the bladder (through a urethral catheter) and any leak volume collected by a weigh boat. The bladder was allowed to rest for at least 15 minutes before initiating the next cystometry trial.

## 2.5 Euthanasia

After completion of all testing, animals were euthanized with a dose of intravenous sodium pentobarbital while under deep isoflurane anesthesia, and death was ensured with a secondary method of euthanasia as approved by the IACUC.

## 2.6 Data analysis

Bladder capacity was measured in each trial and normalized to the control (no-stimulation) group average in each experiment. An ANOVA test and post-hoc pairwise comparisons (unpaired t-test) were used to test for statistical significance in bladder capacity among no-stimulation, closed-loop stimulation, and continuous stimulation across all trials. A significance level of 0.05 was used.

We defined bladder contractions (NVCs or voiding contractions) as bladder pressure increases of at least 6 cm H<sub>2</sub>O in a 4-second interval (independent from the contraction detection algorithm). The number of bladder contractions were counted for each trial and normalized to the average of the no-stimulation trials for each experiment. The timing of each bladder contraction was matched with the stimulation initiation timing, and the true positive rate was calculated by dividing the number of true positives (a bladder contraction successfully identified by the algorithm) by the total number of true bladder contractions. The average interval between bladder contractions for each trial was normalized to the no-stimulation group average for each experiment. Similarly, the peak pressure (maximum pressure during voiding) for each trial was also normalized to the no-stimulation group average for each experiment.

The bladder pressure decoding performance was determined using the normalized root mean squared error (NRMSE) and the correlation coefficient (R) between the measured pressure and estimated pressure [17], [19].

To evaluate the potential effect of SNM on bladder afferent signals, we identified bladder single units that appeared in at least one no stimulation trial and one standard SNM trial. The units were isolated in Offline Sorter (Plexon, Dallas, TX) with automated clustering via principal component analysis followed by manual review of snippet waveform shapes by an experienced spike sorter. Only high-confidence single units that had a clearly-identifiable waveform shape were included in this analysis. For SNM trials, 5 Hz stimulation artifacts were isolated from neural activity based on clearly-differentiable waveforms appearing at a fixed frequency. We confirmed that stimulation artifacts did not obscure any of the bladder unit snippets. To quantify the relationship between identified bladder units and pressure, the correlation coefficient, linear regression slope, and minimum pressure at which a unit started firing (pressure threshold) were determined for each unit. The average change in these parameters from no

stimulation trials to SNM trials was calculated. No statistical analysis was performed due to a small sample size.

### 3. Results

Overall, we performed 30 no-stimulation, 23 closed-loop stimulation, and 9 standard SNM trials across five experiments. Bladder pressure decoding was performed in all closed-loop trials, and some of the no-stimulation and standard SNM trials. Example testing trials in one experiment for all three conditions are shown in Figure 2.

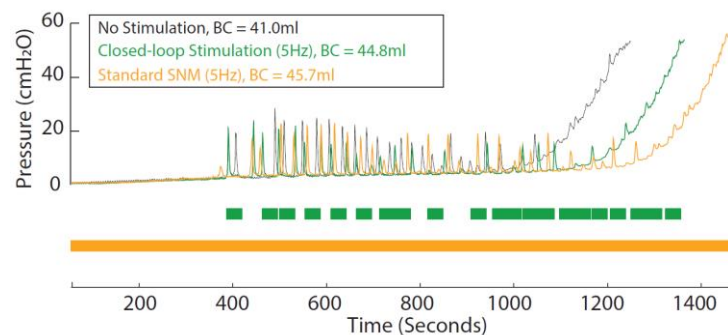

**Figure 2.** Cystometry curves for example no-stimulation, closed-loop stimulation, and standard SNM in Experiment 2. Closed-loop stimulation and standard SNM increased bladder capacity (BC) compared to no-stimulation in these examples.

#### 3.1 Normalized bladder capacity

We observed a  $12.8 \pm 4.6\%$  mean per-experiment increase in normalized bladder capacity in the closed-loop stimulation group across all 5 experiments, and a  $12.9 \pm 6.5\%$  per-experiment increase in normalized bladder capacity in the standard SNM group in 4 experiments (no standard SNM in experiment 5). Across all individual trials performed, the increase in normalized capacity was  $13.8\%$  ( $p < 0.001$ , range: -12 to 34%) for closed-loop stimulation ( $n = 23$  trials) and  $9.1\%$  ( $p = 0.35$ , range: -27% to 42%) for standard SNM ( $n = 9$ , Figure 3a) compared to the control trials ( $n = 30$ ). Closed-loop stimulation resulted in a 4.3% higher normalized capacity compared to standard SNM ( $p = 0.79$ ). Due to time limitations in each acute experiment, different counts of stimulation trial types were performed in each experiment, with an emphasis placed on performing as many closed-loop and no-stimulation (for control and buffering between stimulation trials) trials as possible.

We observed a positive correlation ( $R^2 = 0.13$ ) between normalized bladder capacity and stimulation percentage (total time when stimulation was on divided by total trial time, Figure 3b). While this indicates that more stimulation was associated with a stronger bladder inhibition effect, there was no difference between partial (closed-loop) stimulation and standard SNM in terms of bladder capacity ( $p = 0.79$ ).

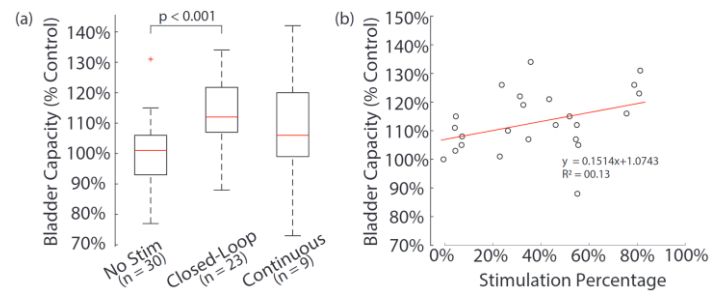

**Figure 3.** (a) Bladder capacity for each stimulation type for all trials. (b) Bladder capacity against stimulation percentage for each trial.

### 3.2 Closed-loop algorithm performance

On average,  $39.5 \pm 12.5\%$  (across  $n = 5$  experiments) of the non-voiding contractions were correctly identified by the decoding algorithm, triggering stimulation. The true positive rate was 11.4% and 48.4% for the first and second halves of the cystometry trials (averaged across  $n = 5$  experiments). Of the stimulation bouts triggered in all trials, 51% of the stimulation occurred in the first 75% of the cystometry, while 49% of the stimulation occurred in the last 25% of the cystometry ( $n = 5$  experiments). Figure 4 shows quartile distribution across all 23 closed-loop trials.

Overall, closed-loop stimulation led to a 112.4% increase in the normalized non-voiding contraction interval ( $n = 5$  experiments), while resulting in a small 3.2% decrease in the normalized number of contractions ( $n = 5$  experiments) per trial. We observed that in some cases the start of stimulation corresponded with an NVC occurrence. This effect was not quantified but may have contributed to a minimal change in NVC count in the closed-loop stimulation group. While standard SNM increased the non-voiding contraction interval by only 26.8%, it decreased the number of non-voiding contractions per void by 51.2%. The peak bladder pressure was slightly increased by closed-loop and continuous stimulation (1.5% and 3.9%).

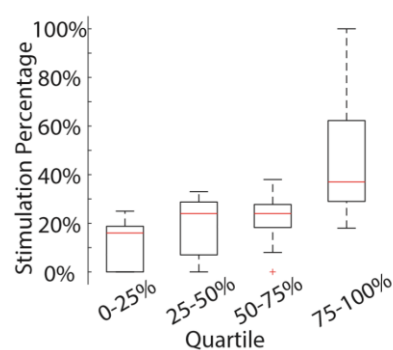

**Figure 4.** Box plots showing the quartile distribution of stimulation for closed-loop stimulation trials.

### 3.3 Decoding performance

Bladder pressure decoding was performed in real-time in each type of trial (Table 1). On average, decoding was performed with 5 DRG microelectrode channels (range: 2-11) in each experiment. As predicted, closed-loop stimulation trials had an increase in NRMSE and a decrease in R for bladder pressure estimation, as additional channel threshold crossings were detected during stimulation. While a cross-channel invalidation method was applied to remove threshold crossings that appeared on over 90% of the channels at the same time, we still observed an overestimation of the bladder pressure during stimulation. This may have been due to stimulation driven units or artifacts that appeared on fewer than 90% of the channels. In addition, we observed a positive correlation between normalized bladder capacity and the decoded pressure correlation coefficient R but not NRMSE (Figure 5).

Table 1. Decoding performance by NRMSE and R across stimulation trials

|            | NRMSE   |        |              | R       |         |              |
|------------|---------|--------|--------------|---------|---------|--------------|
|            | No Stim | CLS    | Standard SNM | No Stim | CLS     | Standard SNM |
| Mean       | 0.19    | 0.29   | 0.18         | 0.83    | 0.62    | 0.78         |
| St. Dev.   | 0.07    | 0.17   | 0.04         | 0.18    | 0.22    | 0.01         |
| n          | 9       | 23     | 3            | 9       | 23      | 3            |
| % Increase |         | 55.27% | -4.57%       |         | -25.91% | -7.07%       |

(CLS = Closed-loop Stimulation)

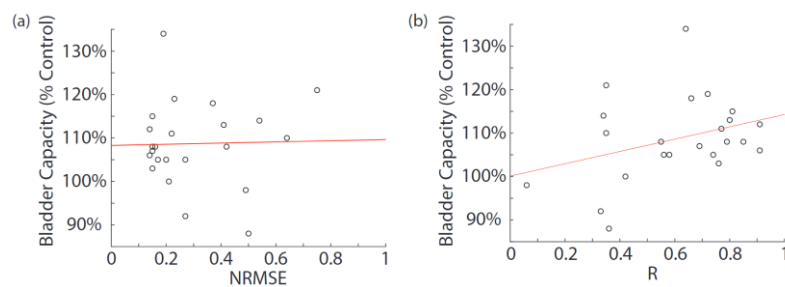

**Figure 5.** (a) Normalized bladder capacity vs. NRMSE ( $R^2 = 0.02$ ,  $p = 0.52$ ) (b) Normalized bladder capacity vs. R. ( $R^2 = 0.08$ ,  $p = 0.18$ ).

### 3.4 Single unit analysis

In experiments 1-4, eight bladder units that appeared in at least one no-stimulation and one standard SNM trial were identified with manual spike sorting. While overall we observed a much larger number of DRG microelectrode channels with bladder activity, only single units that were clearly distinguishable from stimulation artifacts were included in this analysis. On average, the correlation coefficient between the firing rate of these units and the bladder pressure during SNM trials was  $9.1 \pm 57.2\%$  lower than during no-stimulation bladder fills. The slope of linear regression trendlines between the single unit firing rate and bladder pressure in SNM trials was  $35.5 \pm 47.1\%$  lower than no-stimulation trials. The minimum pressure at which bladder units first fired in SNM trials was  $4.7 \pm 5.5$  times higher than in no-stimulation trials. Two of these bladder units are shown in Figure 6, with a representative 3-second interval showing differentiation of bladder units and SNM artifacts in Figure 6c. The parameters for each bladder unit are presented in Table 2.



Table 2. Bladder unit change in correlation coefficient, linear regression slope, and pressure threshold change with stimulation

| Experiment | Unit #   | R Change | Slope Change | Pressure Threshold Change | No Stim Trials | SNM Trials | Stimulation & recording electrode relative locations |
|------------|----------|----------|--------------|---------------------------|----------------|------------|------------------------------------------------------|
| 1          | 1        | -83.8%   | -97.6%       | 389.2%                    | 3              | 1          | Opposite                                             |
| 1          | 2        | 3.4%     | -43.8%       | 37.7%                     | 3              | 1          | Opposite                                             |
| 1          | 3        | -1.2%    | -16.8%       | 85.0%                     | 3              | 1          | Opposite                                             |
| 1          | 4        | 4.1%     | -1.3%        | 65.2%                     | 2              | 1          | Opposite                                             |
| 1          | 5        | 101.8%   | 46.9%        | -80.0%                    | 3              | 1          | Opposite                                             |
| 2          | 1        | -74.5%   | -92.6%       | 1337.0%                   | 3              | 1          | Opposite                                             |
| 3          | 1        | -23.6%   | -42.0%       | 1136.4%                   | 4              | 3          | Opposite                                             |
| 4          | 1        | 1.1%     | -37.1%       | 764.6%                    | 1              | 1          | Same                                                 |
|            | Mean     | -9.1%    | -35.5%       | 466.9%                    |                |            |                                                      |
|            | St. Dev. | 57.2%    | 47.1%        | 546.5%                    |                |            |                                                      |

#### 4. Discussion

In this study, we explored the short-term efficacy of closed-loop sacral nerve stimulation for increasing bladder capacity in an anesthetized animal model. If translatable, our results suggest that closed-loop SNM could have a potential clinical impact by providing automated, individualized therapy that is linked to objective, physiological signals, an extension in device longevity, and a reduction in unwanted or unpleasant stimulation sensations, which are a common adverse event [6]. While an extension in device longevity is primarily advantageous for primary cell devices, in the context of rechargeable devices that stay implanted for longer periods of time [9], closed-loop SNM will increase the recharge interval and improve chronic maintenance of therapy. Our study demonstrates that closed-loop stimulation may allow for this by providing the same or improved performance while applying stimulation a fraction of the time. A reduction in total stimulation time may reduce nerve habituation over time and preserve the responsiveness of the stimulation target. Additionally, our results suggest that SNM desensitizes bladder sensory neurons to changes in bladder pressure. This potential mechanism of SNM may be an important contributor to its therapeutic benefit and warrants further exploration.

We successfully achieved closed-loop SNM by integrating real-time bladder pressure decoding from DRG with the Medtronic Summit RC+S stimulation system. We demonstrated this full integration with in-vivo experiments and showed that closed-loop stimulation had at least the same level of effectiveness as continuous SNM in increasing bladder capacity (Figure 3a), however stimulation was only applied 42.3% of the time. The average normalized increase in bladder capacity across all closed-loop trials (13.8%,  $p < 0.001$  compared to no stimulation) was higher than for standard SNM (9.1%) in this study and similar to a previous study (13.4%) that also performed sacral root stimulation with a chloralose-anesthetized feline model [20]. Zhang et al found that stimulating the dorsal side of the sacral root increased bladder capacity in cats by 64% but used a different stimulation frequency (10Hz) [21]. Their experimental model also had a different set-up, in which one ureter was cut and tied, while the other was used for draining. Jezernik et al. observed that stimulating the dorsal root eliminated reflex bladder contractions [22]. Stimulating only the dorsal side is challenging in humans considering its proximity to the spinal cord and tight space in the spinal column. While Zhang et al. obtained a higher bladder capacity increase than seen in our study, we used a more clinically relevant procedure by maintaining the integrity of the urinary tract and stimulating the extradural spinal root.

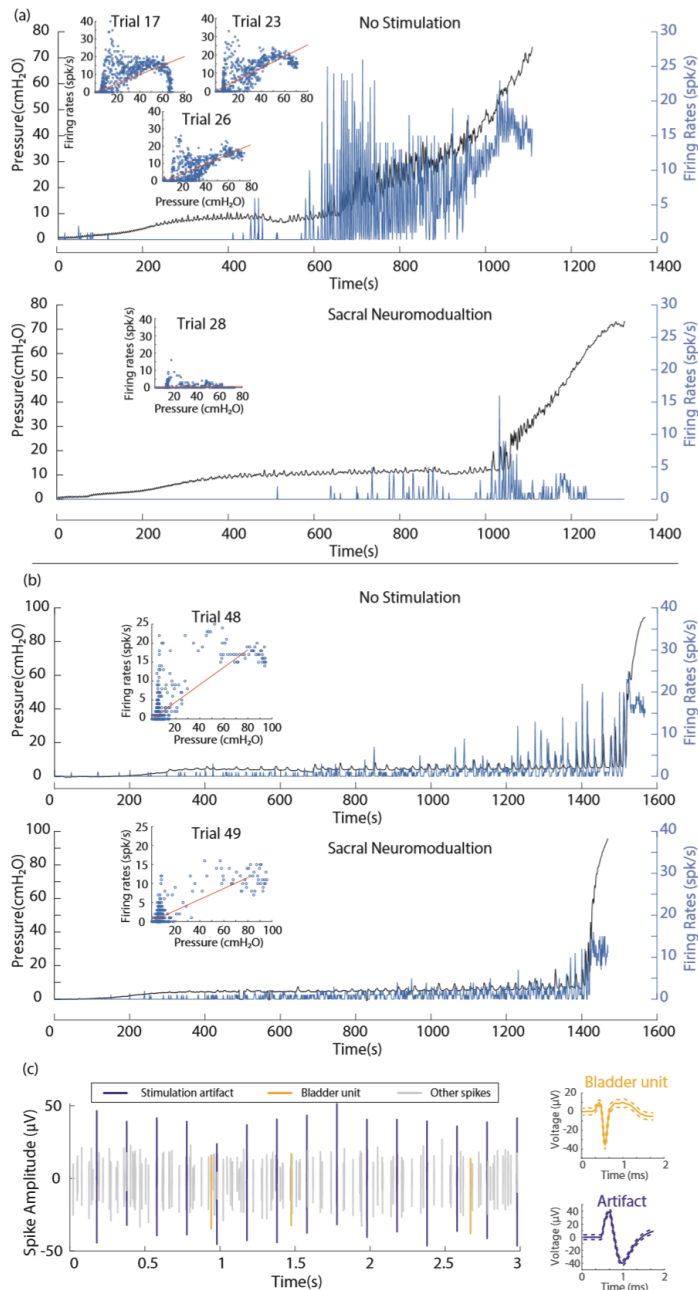

**Figure 6.** Two examples of sorted bladder single units, from experiments 1 (a) [unit 1] and 4 (b), which demonstrate a reduction in sensitivity to bladder pressure changes during SNM. Inset figures plot firing rate against pressure at each calculation interval, with linear regression trend lines overlaid in red. For (a), the no-stimulation Trial 26 is plotted against time. (c) Left: Raster plot of sorted threshold crossings showing a bladder unit, stimulation artifacts, and other crossings during an example SNM trial [exp. 1, unit 2], demonstrating differentiation of signals. Right: averaged bladder unit waveform (yellow) and stimulation artifact waveform (blue).

Many closed-loop studies have shown that stimulation on peripheral nerves during voiding, non-voiding contractions, or later parts of a bladder fill cycle can increase bladder capacity significantly, sometimes to the same level as continuous stimulation [12], [13], [23]. Potts et al. found that in rats SNM only in the second half of the bladder fill cycle increased bladder capacity significantly, while stimulating the first half did not [13]. Wenzel et al. found that pudendal nerve stimulation at the beginning of bladder contractions increased bladder capacity twice as much as continuous stimulation [23]. Similarly, in our study, closed-loop stimulation was dependent upon bladder contractions, and there was more stimulation in the second half of the bladder fill as bladder contractions became more frequent (Figure 4). Clinical studies of dorsal genital nerve stimulation also suggest that stimulation only after the urge to void, for as short as 30 seconds in duration, can lead to mean subjective improvements of 73% in the incontinence score [12]. Compared to these closed-loop strategies, our method does not require patient intervention and uses a sensor implanted near the stimulation site.

An increased NVC frequency or a decreased NVC interval are often associated with overactive bladder in pre-clinical models [24]. While it is unclear whether NVCs occur more often in human patients with OAB, NVCs activate the same bladder sensory neurons as voiding contractions and can therefore elicit an unnecessary urge for voiding that needs to be suppressed [17]. In this study, we demonstrated that both closed-loop stimulation and standard SNM led to a lower number of non-voiding contractions per filling cycle, indicating that contractions were inhibited. Also, closed-loop stimulation increased the interval between contractions compared to the no-

stimulation group while slightly decreasing the number of NVCs per trial, which suggests a redistribution of NVC temporal patterns. It is unclear if this has clinical relevance. We did not expect the peak pressure to increase as a result of stimulation, and our study results were consistent with this expectation. We hypothesize that this outcome is because SNM relaxed the detrusor muscle, rather than tightened the sphincter muscle, which will lead to higher peak pressure. As a result, the overall bladder volume increased while peak pressure stayed consistent across trials.

Five Hz stimulation was chosen for SNM based on frequency optimization trials that were performed in one pilot experiment. The selection of this frequency is consistent with a prior study demonstrating that 5 Hz dorsal root stimulation was optimal for increasing bladder capacity when compared to other frequencies [21] and similar results from another study that concluded 7.5Hz or 10Hz are optimal in minimizing iso-volumetric contractions [20]. This frequency seems to consistently inhibit bladder contractions within felines as we confirmed a reduced isovolumetric contraction amplitude in all experiments in this study [20].

The NRMSE and R decoding performance (Table 1) for no-stimulation trials was an improvement upon (NRMSE) or consistent with (R) our previously published bladder pressure decoding results ( $0.28 \pm 0.13$  and  $0.84 \pm 0.19$ , respectively) [17]. As anticipated, closed-loop stimulation increased the NRMSE ( $0.29$ , similar to [17]) and decreased the R for bladder pressure estimation, as additional threshold crossings were detected during stimulation (due to possible stimulation artifacts and/or stimulation driven units). Refinement of our cross-channel invalidation may be necessary. Additionally, stimulation itself may have led to a reduction in bladder sensory neuron sensitivity (Figure 6), which would have decreased decoding efficacy during SNM trials. However, it is unclear if sensory feedback is critically necessary during stimulation itself and may not have significantly altered the decision-making process of the closed-loop algorithm.

We did not observe a strong correlation between bladder capacity and the NRMSE for pressure estimation (Figure 5a). Stimulation was only triggered by the closed-loop algorithm based on a relative increase in the bladder pressure, therefore the system could tolerate a small prediction error as well as any amount of baseline offset due to a shift in the noise floor. A large absolute error (or a large NRMSE) might not lead to a high error rate in our closed-loop system, but a low correlation coefficient may indicate a possible loss of channels and lead to inaccurate sensory feedback, less efficient stimulation, and ultimately, lower bladder capacity. The weak but positive correlation between R and normalized bladder capacity suggests that bladder capacity increases might be associated with accurate sensory feedback and timing of stimulation initiation in closed-loop neuromodulation.

The leading hypothesis for the mechanism of action of SNM is that SNM stimulates sensory pathways, bringing down the level of urgency by inhibiting sensory neural firing [21], [25]. A study in cats showed that stimulating sacral-level dorsal roots inhibits isovolumetric bladder contractions, while stimulating the ventral root did not [21], which is consistent with this hypothesis. In our study, we were able to analyze the effect of SNM on some bladder sensory neurons (Figure 6, Table 2). Our findings suggest a desensitization in bladder sensory neurons during stimulation, reflected in a reduction in the firing rate during a rise in pressure, an increase in the pressure threshold at which firing was initiated, and a decrease in the correlation coefficient between the firing rates and bladder pressure. While this was a small sample size, the pattern across these neurons was consistent for both slope (decrease in 7 out of 8 neurons) and pressure threshold (increase in 7 out of 8 neurons). The one bladder unit that did not follow the trends did not have any unique characteristics from other bladder units (Table 2). We also confirmed that in at least some cases bladder unit spikes did not overlap with the large amplitude stimulation artifacts (example shown in Figure 6c), which otherwise could lead to underestimation of the

number of bladder unit spikes. Further study evaluating a larger number of bladder sensory neurons, particularly if performed longitudinally, may yield greater insights into SNM mechanisms.

Both pre-clinical and clinical neurostimulation evidence suggests that continuous stimulation may not be necessary to deliver optimal improvement in bladder capacity and incontinence [12], [13], [23]. Therefore, it is important to minimize the overall amount of stimulation delivered, as long-term chronic stimulation can facilitate neural habituation [26], reduce the effectiveness of SNM, and result in unwanted and unpleasant sensations [6]. The methods developed in this study are translatable to clinical use. While DRG were accessed with a laminectomy in this study, DRG can also be accessed percutaneously at the lumbosacral level [27] for use of a non-penetrating or minimally-penetrating electrode within the limited vertebral space. Recent research has demonstrated that DRG cell bodies are more likely to be located near the surface of feline and human DRG [28], [29], and that a thin-film DRG-surface electrode can record neural activity from the bladder in felines [30]. New electrodes with a lower profile and minimal immune response would be more feasible to implement clinically than those used in this study.

In this study we used animals without OAB. This may have limited the improvements that were possible for the bladder measures. It is also possible that anesthesia had a suppressive effect, or the relatively short intervals between bladder fills with different stimulation types had a carry-over effect. Awake testing with a dysfunctional bladder model across multi-week intervals may eliminate these potential confounds and would enable longitudinal comparisons between continuous stimulation and closed-loop stimulation. Our previous pudendal nerve stimulation study [31] demonstrated the feasibility of performing bladder neuromodulation and recording urodynamic parameters (e.g. cystometry curve, bladder capacity, and voiding efficiency) in a freely behaving feline model, and in a separate study we have observed bladder units in chronic feline experiments across multiple weeks [32]. Moving forward, experiments using awake, behaving animals may be most useful for evaluating both the acute and chronic effects of closed-loop SNM without the influence of anesthesia.

## 5. Conclusion

We have demonstrated that closed-loop SNM using DRG signals as sensory feedback can lead to a significant increase in bladder capacity in an anesthetized feline model. Our closed-loop approach matched the effectiveness of standard, continuous SNM while using significantly less stimulation time. Additionally, our neural recordings from bladder sensory afferents suggested that SNM causes a shift in the relationship between bladder sensory neuron firing rates and bladder pressure, which is consistent with the hypothesis that SNM works by reducing bladder afferent activity. Long-term studies with behavioral animal models will mitigate the effects of anesthesia and repeated bladder fills in a short time frame, and will be critical as a bridging translational step prior to clinical studies.

## 6. Acknowledgements

The authors thank Dr. Sarah Offutt and Dr. Thaddeus Brink for providing comments and discussion, and Eric Kennedy, Ahmad Jiman, David Ratze, Jessica Xu, Zuha Yousuf, Alec Socha, Vlad Marcu, Manorama Kadwani, Nicholas Peck-Dimit, and Hannah Parrish for assisting with data collection. The authors also thank the University of Michigan Unit for Laboratory Animal Medicine for assistance with animal care. This study was supported by a research grant from Medtronic and awards from the National Institutes of Health SPARC program (OT2OD023873, OT2OD024907). The opinions expressed in this article are the authors' own and do not reflect the view of Medtronic or the National Institutes of Health. Drs. Zirpel and Bittner are employees of Medtronic.

## 7. Data Availability

Raw data and analysis software code are available at <https://osf.io/jq5hn/>.

## 8. References

- [1] A. J. Wein and E. S. Rovner, "Definition and epidemiology of overactive bladder.," *Urology*, vol. 60, no. 5 Suppl 1, pp. 7–12, Nov. 2002.
- [2] J. M. Latini and A. Giannantoni, "Pharmacotherapy of overactive bladder: epidemiology and pathophysiology of overactive bladder.," *Expert Opin. Pharmacother.*, vol. 12, no. 7, pp. 1017–1027, 2011.
- [3] C. A. C. Coupland, T. Hill, T. Dening, R. Morriss, M. Moore, and J. Hippisley-Cox, "Anticholinergic Drug Exposure and the Risk of Dementia," *JAMA Intern. Med.*, vol. 179, no. 8, p. 1084, Aug. 2019.
- [4] T. A. T. Marcelissen, M. S. Rahnema'i, A. Snijkers, B. Schurch, and P. De Vries, "Long-term follow-up of intravesical botulinum toxin-A injections in women with idiopathic overactive bladder symptoms," *World J. Urol.*, vol. 35, no. 2, pp. 307–311, Feb. 2017.
- [5] J. Yeaw, J. S. Benner, J. G. Walt, S. Sian, and D. B. Smith, "Comparing Adherence and Persistence Across 6 Chronic Medication Classes," *J. Manag. Care Pharm.*, vol. 15, no. 9, pp. 728–740, Nov. 2009.
- [6] S. Siegel et al., "Five-Year Followup Results of a Prospective, Multicenter Study of Patients with Overactive Bladder Treated with Sacral Neuromodulation," *J. Urol.*, vol. 199, no. 1, pp. 229–236, Jan. 2018.
- [7] K. Amin, D. Moskowitz, K. C. Kobashi, U. J. Lee, and A. Lucioni, "Do Patients Discontinue Overactive Bladder Medications after Sacral Neuromodulation?," *J. Urol.*, vol. 201, no. 5, pp. 973–978, 2019.
- [8] J. D. Redshaw et al., "Protocol for a randomized clinical trial investigating early sacral nerve stimulation as an adjunct to standard neurogenic bladder management following acute spinal cord injury," *BMC Urol.*, vol. 18, no. 1, p. 72, Dec. 2018.
- [9] B. Blok et al., "Three month clinical results with a rechargeable sacral neuromodulation system for the treatment of overactive bladder," *Neurourol. Urodyn.*, vol. 37, pp. S9–S16, 2018.
- [10] K. M. Peters, P. Kandagatla, K. A. Killinger, C. Wolfert, and J. A. Boura, "Clinical outcomes of sacral neuromodulation in patients with neurologic conditions," *Urology*, vol. 81, no. 4, pp. 738–744, 2013.
- [11] P. Cariga, M. Catley, C. J. Mathias, and P. H. Ellaway, "Characteristics of habituation of the sympathetic skin response to repeated electrical stimuli in man," *Clin. Neurophysiol.*, vol. 112, no. 10, pp. 1875–1880, 2001.
- [12] H. M. K. Van Breda, F. F. Farag, F. M. J. Martens, J. P. F. A. Heesakkers, and N. J. M. Rijkhoff, "Subject-Controlled, On-demand, Dorsal Genital Nerve Stimulation to Treat Urgency Urinary Incontinence; A Pilot," *Front. Neurosci.*, vol. 10, no. FEB, pp. 1–7, 2016.
- [13] B. A. Potts et al., "Timing of sacral neurostimulation is important for increasing bladder capacity in the anesthetized rat," *Am. J. Physiol. Renal Physiol.*, vol. 317, no. 5, pp. F1183–F1188, Aug. 2019.
- [14] T. M. Bruns, R. A. Gaunt, and D. J. Weber, "Multielectrode array recordings of bladder and perineal primary afferent activity from the sacral dorsal root ganglia," *J. Neural Eng.*, vol. 8, no. 5, p. 056010, Aug. 2011.
- [15] Z. Wang, L. Liao, H. Deng, X. Li, and G. Chen, "The inhibitory effect of sacral dorsal root ganglion stimulation on nociceptive and nonnociceptive bladder reflexes in cats," *World Journal of Urology*, vol. 36, no. 5, pp. 829–836, 27-May-2018.

- [16] T. M. Bruns, D. J. Weber, and R. A. Gaunt, "Microstimulation of afferents in the sacral dorsal root ganglia can evoke reflex bladder activity," *Neurourol. Urodyn.*, vol. 34, no. 1, pp. 65–71, 2015.
- [17] Z. Ouyang, Z. J. Sperry, N. D. Barrera, and T. M. Bruns, "Real-Time Bladder Pressure Estimation for Closed-Loop Control in a Detrusor Overactivity Model," *IEEE Trans. Neural Syst. Rehabil. Eng.*, vol. 27, no. 6, pp. 1209–1216, 2019.
- [18] C. H. Fry et al., "Animal models and their use in understanding lower urinary tract dysfunction," *Neurourol. Urodyn.*, vol. 29, no. 4, pp. 603–608, Apr. 2010.
- [19] S. E. Ross, Z. Ouyang, S. Rajagopalan, and T. M. Bruns, "Evaluation of Decoding Algorithms for Estimating Bladder Pressure from Dorsal Root Ganglia Neural Recordings," *Ann. Biomed. Eng.*, vol. 46, no. 2, pp. 233–246, Nov. 2018.
- [20] A. E. Snellings and W. M. Grill, "Effects of stimulation site and stimulation parameters on bladder inhibition by electrical nerve stimulation," *BJU Int.*, vol. 110, no. 1, pp. 136–143, Jan. 2012.
- [21] F. Zhang et al., "Neural pathways involved in sacral Neuromodulation of reflex bladder activity in cats," *Am. J. Physiol. - Ren. Physiol.*, vol. 304, no. 6, pp. F710–F717, 2013.
- [22] S. Jezernik, W. M. Grill, and T. Sinkjaer, "Detection and inhibition of hyperreflexia-like bladder contractions in the cat by sacral nerve root recording and electrical stimulation," *Neurourol. Urodyn.*, vol. 20, no. 2, pp. 215–230, Jan. 2001.
- [23] B. J. Wenzel, J. W. Boggs, K. J. Gustafson, and W. M. Grill, "Closed loop electrical control of urinary continence.," *J. Urol.*, vol. 175, no. 4, pp. 1559–1563, 2006.
- [24] F. A. Kullmann, G. I. Wells, C. L. Langdale, J. Zheng, and K. B. Thor, "Stability of the Acetic Acid-Induced Bladder Irritation Model in Alpha Chloralose-Anesthetized Female Cats," *PLoS One*, vol. 8, no. 9, p. e73771, 2013.
- [25] W. W. Leng and M. B. Chancellor, "How sacral nerve stimulation neuromodulation works," *Urol. Clin. North Am.*, vol. 32, no. 1, pp. 11–18, 2005.
- [26] L. M. Harrison, J. A. Norton, and J. A. Stephens, "Habituation of cutaneomuscular reflexes recorded from the first dorsal interosseous and triceps muscle in man," *J. Neurol. Sci.*, vol. 177, no. 1, pp. 32–40, 2000.
- [27] L. Liem et al., "One-Year Outcomes of Spinal Cord Stimulation of the Dorsal Root Ganglion in the Treatment of Chronic Neuropathic Pain," *Neuromodulation Technol. Neural Interface*, vol. 18, no. 1, pp. 41–49, Jan. 2015.
- [28] A. K. Ostrowski, Z. J. Sperry, G. Kulik, and T. M. Bruns, "Quantitative models of feline lumbosacral dorsal root ganglia neuronal cell density," *J. Neurosci. Methods*, vol. 290, pp. 116–124, 2017.
- [29] Z. J. Sperry, R. D. Graham, N. Peck-Dimit, S. F. Lempka, and T. M. Bruns, "Spatial models of cell distribution in human lumbar dorsal root ganglia," *J. Comp. Neurol.*, p. cne.24848, Jan. 2020.
- [30] Z. J. Sperry et al., "Flexible microelectrode array for interfacing with the surface of neural ganglia," *J. Neural Eng.*, vol. 15, no. 3, p. 036027, 2018.
- [31] Z. A. Ouyang et al., "Behavioral Monitoring and Neuromodulation of Feline Voiding Function," in *International IEEE/EMBS Conference on Neural Engineering, NER*, 2019, vol. 2019-March, pp. 1058–1061.
- [32] A. Khurram et al., "Chronic monitoring of lower urinary tract activity via a sacral dorsal root ganglia interface," *J. Neural Eng.*, vol. 14, no. 3, p. 036027, Jun. 2017.
